# Supplementary material for: Metastability as a candidate neuromechanistic biomarker of schizophrenia pathology
Source: PubMed Central journal article supplement (PMC10035891; doi:10.1371/journal.pone.0282707), 2023-03-23
Supplement: pone.0282707.s017.pdf [file pone.0282707.s017.pdf]

## **Supporting Text S1**

### **Phase synchrony based metastability**

#### **Global and local metastability – group-level neuromechanistic biomarkers of schizophrenia**

We calculated global and local metastability to compare group-level dynamics between case-control groups as the standard deviation of instantaneous phase synchrony as in [1]–[4]. Metastability measures the balance between functional integration and functional segregation, has been found to be stable across multiple acquisitions in healthy young adults [1], and is perhaps uniquely suitable for assessing schizophrenia. We calculated global and local metastability within each mode and for each run.

#### **Global metastability**

For the HCPEP dataset we first investigated group (CON, NAP), run (RUN1, RUN2, RUN3, RUN4), and group x run effects on global META. Using a 2x4 non-parametric ANOVA with the Aligned Rank Transform (ART) [5], [6], we found a significant interaction  $F(3,399)=3.192$ ,  $p=0.024$  for group x run.

#### **Main effects of run**

The main effect of run was not significant for either the CON or the NAP group.

#### **Main effects of group**

We found significant main effects of group which were driven by differences in META between CON and NAP in RUN4 ( $p=0.019$ , *effect size*= 0.202). See Table 1 for complete results.

**Table 1. Non-parametric statistical tests for differences in global META between CON and NAP across runs.**

| META                                                                             |             |        |         |          |                      |           |       |          |         |           |
|----------------------------------------------------------------------------------|-------------|--------|---------|----------|----------------------|-----------|-------|----------|---------|-----------|
| <b>Step 1 2x4 non-parametric ANOVA using ART</b>                                 |             |        |         |          |                      |           |       |          |         |           |
|                                                                                  | Term        | F      | Df      | Df.res   | Pr(>F)               |           |       |          |         |           |
| COND                                                                             | COND        | 0.235  | 1       | 133      | 0.629                |           |       |          |         |           |
| RUN                                                                              | RUN         | 1.302  | 3       | 399      | 0.273                |           |       |          |         |           |
| COND:RUN                                                                         | COND:RUN    | 3.192  | 3       | 399      | 0.024                |           |       |          |         |           |
| <b>Step 2 CON:1x4 repeated measures non-parametric ANOVA using Friedman test</b> |             |        |         |          |                      |           |       |          |         |           |
|                                                                                  | chi-squared | df     | p.value | method   | data                 |           |       |          |         |           |
|                                                                                  | 0.872       | 3      | 0.832   | Friedman | META and RUN and SUB |           |       |          |         |           |
| <b>Step 4 NAP:1x4 repeated measures non-parametric ANOVA using Friedman test</b> |             |        |         |          |                      |           |       |          |         |           |
|                                                                                  | chi-squared | df     | p.value | method   | data                 |           |       |          |         |           |
|                                                                                  | 6.673       | 3      | 0.083   | Friedman | META and RUN and SUB |           |       |          |         |           |
| <b>Step 6 Non-parametric Wilcox test between CON and NAP for each run</b>        |             |        |         |          |                      |           |       |          |         |           |
|                                                                                  | .y.         | group1 | group2  | n1       | n2                   | statistic | p     | p.signif | effsize | magnitude |
| RUN1                                                                             | META        | CON    | NAP     | 53       | 82                   | 2082      | 0.683 | ns       | 0.035   | small     |
| RUN2                                                                             | META        | CON    | NAP     | 53       | 82                   | 2131      | 0.852 | ns       | 0.016   | small     |
| RUN3                                                                             | META        | CON    | NAP     | 53       | 82                   | 2003      | 0.445 | ns       | 0.066   | small     |
| RUN4                                                                             | META        | CON    | NAP     | 53       | 82                   | 2694      | 0.019 | *        | 0.202   | small     |

ART, Aligned Rank Transform; CON, controls; NAP, non-affective psychosis

For the Cobre dataset, we found a statistically significant difference  $t(126)=-3.35$ ,  $p=0.002$  between CON and SCHZ for global metastability.

## Local Metastability

Global metastability reflects the average metastability across the modes. We were interested to also assess the local metastability in the modes.

For the HCPEP dataset we first investigated group (CON, NAP), run (RUN1, RUN2, RUN3, RUN4), and group x run effects on global META for each mode  $\psi_1, \psi_2, \psi_3, \psi_4, \psi_5$ . Using a 2x4 non-parametric ANOVA with the Aligned Rank Transform (ART) [5], [6], we found significant interactions for run x group in  $\psi_4$   $F(3,399)=3.665$ ,  $p=0.013$ ,  $\psi_5$   $F(3,399)=11.325$ ,  $p<0.001$ .

## Main effects of run

In the CON group, we found significant main effects of run in  $\psi_5$ ,  $\chi^2 = 9$ ,  $p<0.03$ . In the NAP group, we found significant main effects of run in  $\psi_4$ ,  $\chi^2 = 19.77$ ,  $p<0.001$

and in  $\psi_5$ , for  $\chi^2 = 21.81$ ,  $p < 0.001$ . The drivers for these effects and the associated effect sizes are detailed in S2 Supplementary Information.

### **Main effects of group**

We found significant main effects of group in modes  $\psi_4$  and  $\psi_5$ . The effect sizes of these differences were compared to the largest effect size between any pair of runs for that mode ( $\psi_4$ , *effect size*=0.308,  $\psi_5$ , *effect size*=0.410). We retained only group differences that were greater than these run effects. We thus found significant group differences for  $\psi_5$  in RUN1 ( $p < 0.001$ , *effect size*=0.442).

We found a significant main effect of group for  $\psi_1$ ,  $p = 0.0361$ , *effect size*=0.090. There were no significant main effects of group for  $\psi_2$  and  $\psi_3$ .

We thus inferred that mode metastability differed between CON and NAP in  $\psi_1$  in all runs, and in  $\psi_5$  in RUN1.

For the Cobre dataset, we found significant differences in mode META between CON and SCHZ in  $\psi_3$   $t(128) = -4.69$ ,  $p < 0.001$ , and  $\psi_5$   $t(122) = -3.550$ ,  $p = 0.003$ .

Complete statistical results for each dataset can be found in S2 Supporting Information. S6 Fig below provides an overview of mode metastability data for each dataset in the form of raincloud plots.

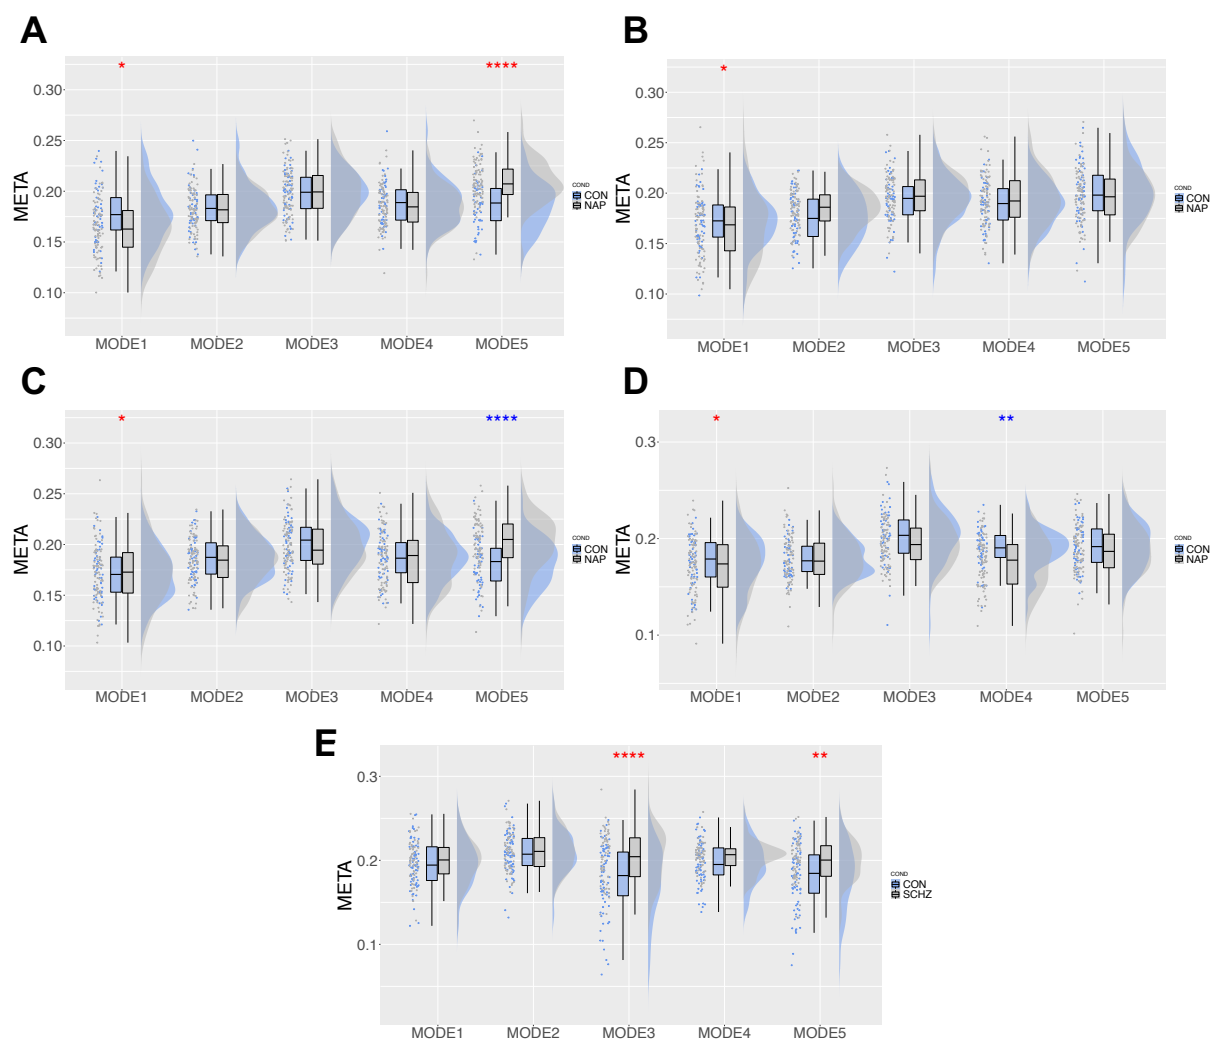

**Fig S6. Raincloud plots for META in each mode for HCPEP and Cobre datasets.** Raincloud plots show from left to right the raw data, boxplots showing the median, upper and lower quartiles, upper and lower extremes, and the distributions of the raw data. **A)** HCPEP RUN1. **B)** HCPEP RUN2. **C)** HCPEP RUN3. **D)** HCPCP RUN4. **E)** Cobre dataset. \*=0.05, \*\*=0.01, \*\*\*=0.001, \*\*\*\*<0.001. Red \* effect size between groups greater than effect size between runs. Blue \* effect size between groups less than largest effect size between runs.

## References

- [1] F. Hancock *et al.*, 'Metastability, fractal scaling, and synergistic information processing: What phase relationships reveal about intrinsic brain activity', *NeuroImage*, vol. 259, p. 119433, Oct. 2022, doi: 10.1016/j.neuroimage.2022.119433.
- [2] M. Wildie and M. Shanahan, 'Metastability and chimera states in modular delay and pulse-coupled oscillator networks', *Chaos Interdiscip. J. Nonlinear Sci.*, vol. 22, no. 4, p. 043131, Dec. 2012, doi: 10.1063/1.4766592.

- [3] M. Shanahan, 'Metastable chimera states in community-structured oscillator networks', *Chaos Interdiscip. J. Nonlinear Sci.*, vol. 20, no. 1, p. 013108, Mar. 2010, doi: 10.1063/1.3305451.
- [4] J. Cabral, E. Hugues, O. Sporns, and G. Deco, 'Role of local network oscillations in resting-state functional connectivity', *NeuroImage*, vol. 57, no. 1, pp. 130–139, Jul. 2011, doi: 10.1016/j.neuroimage.2011.04.010.
- [5] L. A. Elkin, M. Kay, J. J. Higgins, and J. O. Wobbrock, 'An Aligned Rank Transform Procedure for Multifactor Contrast Tests', in *The 34th Annual ACM Symposium on User Interface Software and Technology*, Virtual Event USA, Oct. 2021, pp. 754–768. doi: 10.1145/3472749.3474784.
- [6] J. O. Wobbrock, L. Findlater, D. Gergle, and J. J. Higgins, 'The aligned rank transform for nonparametric factorial analyses using only anova procedures', in *Proceedings of the SIGCHI Conference on Human Factors in Computing Systems*, Vancouver BC Canada, May 2011, pp. 143–146. doi: 10.1145/1978942.1978963.
